# Supplementary material for: Multidimensional analysis of gene expression reveals TGFB1I1-induced EMT contributes to malignant progression of astrocytomas
Source: PubMed Central journal article supplement (PMC4350345; doi:10.18632/oncotarget.2518), 2014-12-31
Supplement: oncotarget-05-12593-s001.pdf [file oncotarget-05-12593-s001.pdf]

SUPPLEMENTARY FIGURES AND TABLES

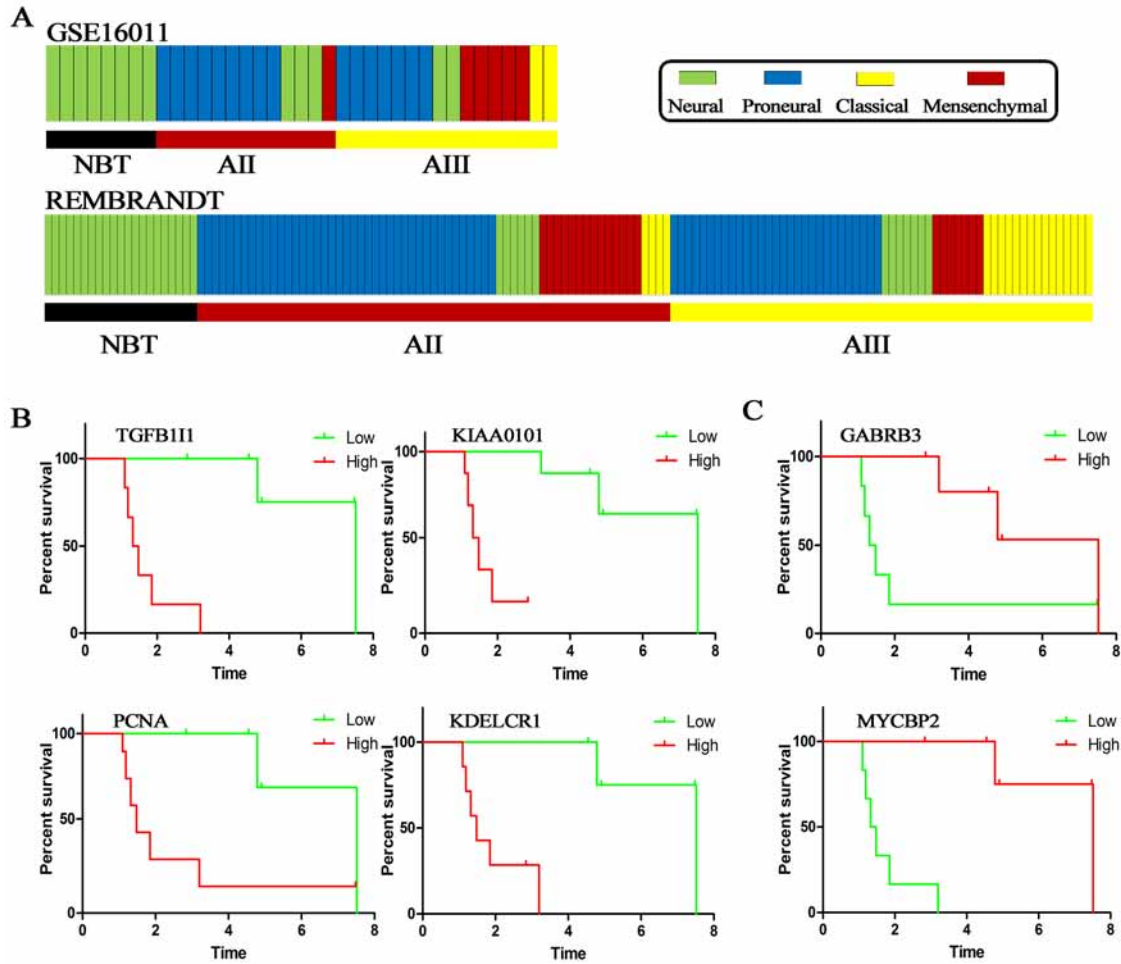

Supplementary Figure S1: (A) The classification system of the TCGA was projected into samples of GSE16011 and REMBRANDT. (B and C) Survival analysis was performed by Kaplan-meier plot on candidate genes in GSE16011 database: (B) up-regulated genes; (C) down-regulated genes.

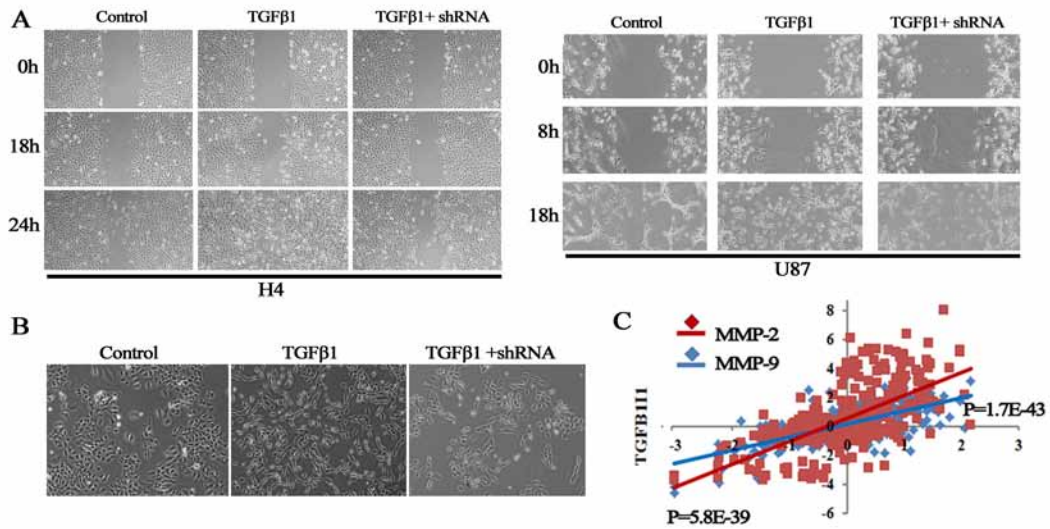

**Supplementary Figure S2: (A) Wound healing assay demonstrated that TGF-β1 treatment accelerated wound close of H4 and U87 cells. TGFβ111 knockdown reversed the TGF-β1 enhanced migration. (B) H4 cells with longer branches were more scattered upon TGF-β1 treatment, whereas these phenotypes were reversed by TGFβ111 specific shRNA. (C) TGFβ111 expression level was positively correlated with the invasion markers, MMP-2/9.**

**Supplementary Table S1. Clinical characteristics on samples of the study in CGGA database**

| <b>Variables</b>       | <b>NBT(n=6)</b> | <b>AII(n=217)</b> | <b>AIII(n=40)</b> | <b>Total*(n=257)</b> |
|------------------------|-----------------|-------------------|-------------------|----------------------|
| <b>Mean age(range)</b> | 50.8(29–69)     | 37.9(13–72)       | 42.9(18–74)       | 38.7(13–74)          |
| <b>Gender(%)</b>       |                 |                   |                   |                      |
| <b>male</b>            | 4(66.7%)        | 133(61.3%)        | 23(57.5%)         | 156(60.7%)           |
| <b>female</b>          | 2(33.3%)        | 84(38.7%)         | 17(42.5%)         | 101(39.3%)           |

\*patients with gliomas

**Supplementary Table S3. Cox regression analysis of information of 58 AII**

| Variable    | Number of case | P value |
|-------------|----------------|---------|
| <b>Age</b>  |                | .082    |
| <37         | 29(50%)        |         |
| ≥37         | 29(50%)        |         |
| <b>Sex</b>  |                | .373    |
| Male        | 37(64%)        |         |
| Female      | 21(36%)        |         |
| <b>KPS</b>  |                | .021    |
| ≤80         | 15(26%)        |         |
| >80         | 43(74%)        |         |
| <b>1p</b>   |                | .064    |
| No loss     | 49(89%)        |         |
| Loss        | 6(11%)         |         |
| <b>19q</b>  |                | .056    |
| No loss     | 48(87%)        |         |
| Loss        | 7(13%)         |         |
| <b>P53</b>  |                | .410    |
| Mutation    | 19(46%)        |         |
| Wild type   | 22(54%)        |         |
| <b>IDH1</b> |                | .400    |
| Mutation    | 42(74%)        |         |
| Wild type   | 15(26%)        |         |

**Supplementary Table S4. The primer sequences for TGFB1I1, GSY1 and GABRB3**

| <b>TGFB1I1</b> |                              | <b>Length</b> | <b>TM</b> |
|----------------|------------------------------|---------------|-----------|
| Forward Primer | 5'-TACAGCACGGTATGCAAGCC-3    | 20            | 62.6      |
| Reverse Primer | 5'-GCAACCGATCTAGCTCACAGAG-3  | 22            | 62.4      |
| <b>GSY1</b>    |                              |               |           |
| Forward Primer | 5'-GCGCTCACGTCTTCACTACTG-3   | 21            | 63        |
| Reverse Primer | 5'-TCCAGATGCCCATAAAAATGGC-3  | 22            | 61        |
| <b>GABRB3</b>  |                              |               |           |
| Forward Primer | 5'-GATAAAAGGCTCGCCTATTCTGG-3 | 23            | 60.8      |
| Reverse Primer | 5'-GATCATGCGGTTTTTCACTGTC-3  | 22            | 60.1      |

Supplementary Table S5.

| Probe        | symbol    | R        | P value  |
|--------------|-----------|----------|----------|
| A_23_P96568  | FLNA      | 0.781335 | 5.06E-65 |
| A_23_P76006  | SERPINH1  | 0.777496 | 5.32E-64 |
| A_23_P323563 | PLEKHG2   | 0.761359 | 6.43E-60 |
| A_23_P337934 | FBLIM1    | 0.757977 | 4.19E-59 |
| A_23_P65240  | COL4A1    | 0.755438 | 1.68E-58 |
| A_23_P205031 | COL4A2    | 0.754683 | 2.53E-58 |
| A_32_P28284  | TPM4      | 0.753448 | 4.93E-58 |
| A_23_P254888 | ZYX       | 0.748616 | 6.44E-57 |
| A_23_P33277  | BMP1      | 0.745535 | 3.22E-56 |
| A_32_P21993  | TPM4      | 0.745166 | 3.89E-56 |
| A_23_P8055   | NRM       | 0.744228 | 6.32E-56 |
| A_32_P56001  | CD93      | 0.743519 | 9.10E-56 |
| A_24_P129417 | BMP1      | 0.742898 | 1.25E-55 |
| A_23_P144896 | PDLIM7    | 0.739159 | 8.35E-55 |
| A_23_P162970 | IPO4      | 0.738226 | 1.33E-54 |
| A_24_P935491 | COL3A1    | 0.737289 | 2.13E-54 |
| A_23_P142533 | COL3A1    | 0.736034 | 3.98E-54 |
| A_23_P165722 | EIF4E2    | 0.735531 | 5.10E-54 |
| A_23_P5273   | SBNO2     | 0.734928 | 6.87E-54 |
| A_23_P331479 | KIAA1949  | 0.732909 | 1.85E-53 |
| A_23_P210811 | CD93      | 0.731868 | 3.08E-53 |
| A_23_P141974 | TPM4      | 0.73138  | 3.91E-53 |
| A_23_P201628 | LAMC1     | 0.729192 | 1.12E-52 |
| A_23_P207520 | COL1A1    | 0.724157 | 1.23E-51 |
| A_23_P52697  | CD248     | 0.721753 | 3.80E-51 |
| A_23_P251695 | NXT1      | 0.716641 | 3.99E-50 |
| A_23_P63038  | LEPRE1    | 0.716604 | 4.06E-50 |
| A_23_P49338  | TNFRSF12A | 0.714997 | 8.41E-50 |
| A_23_P79622  | FKBP7     | 0.714104 | 1.26E-49 |
| A_24_P402242 | COL3A1    | 0.712531 | 2.55E-49 |
| A_23_P432360 | PMM2      | 0.712457 | 2.64E-49 |
| A_23_P23191  | HSPG2     | 0.712181 | 2.98E-49 |
| A_23_P92261  | ECE2      | 0.712058 | 3.15E-49 |
| A_24_P68342  | COL4A1    | 0.711743 | 3.62E-49 |
| A_23_P111995 | LOXL2     | 0.711066 | 4.90E-49 |
| A_24_P39508  | CMTM3     | 0.709098 | 1.17E-48 |

(Continued)

| Probe        | symbol   | R        | P value  |
|--------------|----------|----------|----------|
| A_24_P42517  | KDELR2   | 0.708837 | 1.31E-48 |
| A_23_P113212 | TMEM45A  | 0.707834 | 2.04E-48 |
| A_24_P211565 | C1QTNF6  | 0.70388  | 1.14E-47 |
| A_24_P106145 | WDR1     | 0.70291  | 1.73E-47 |
| A_23_P303210 | IKBIP    | 0.701946 | 2.61E-47 |
| A_23_P393598 | CD276    | 0.700762 | 4.33E-47 |
| A_24_P234196 | RRM2     | 0.70043  | 4.98E-47 |
| A_23_P22224  | EIF4EBP1 | 0.69646  | 2.65E-46 |
| A_24_P382187 | IGFBP4   | 0.695064 | 4.75E-46 |
| A_23_P256956 | KIF20A   | 0.694206 | 6.78E-46 |
| A_23_P200443 | SHC1     | 0.694195 | 6.81E-46 |
| A_23_P205789 | GABPB1   | 0.69195  | 1.72E-45 |
| A_23_P395438 | HTRA3    | 0.688736 | 6.37E-45 |
| A_23_P151506 | PLEK2    | 0.687723 | 9.59E-45 |
| A_24_P739344 | NOX4     | 0.687011 | 1.28E-44 |
| A_23_P50349  | TRIP10   | 0.686572 | 1.52E-44 |
| A_23_P83818  | COL5A1   | 0.686418 | 1.62E-44 |
| A_23_P136978 | SRPX2    | 0.685945 | 1.96E-44 |
| A_23_P27096  | PFN1     | 0.685644 | 2.21E-44 |
| A_23_P10542  | HTRA3    | 0.685505 | 2.34E-44 |
| A_23_P95470  | CD151    | 0.68546  | 2.38E-44 |
| A_24_P914479 | SNX5     | 0.685292 | 2.54E-44 |
| A_24_P59220  | POTEF    | 0.685046 | 2.81E-44 |
| A_24_P277934 | COL1A2   | 0.684512 | 3.47E-44 |
| A_23_P165848 | EMILIN1  | 0.683691 | 4.81E-44 |
| A_23_P54313  | CD276    | 0.683477 | 5.24E-44 |
| A_23_P107421 | TK1      | 0.683222 | 5.80E-44 |
| A_23_P211233 | COL6A2   | 0.682608 | 7.39E-44 |
| A_23_P19938  | KDELR2   | 0.682567 | 7.51E-44 |
| A_23_P207896 | CSNK1D   | 0.682025 | 9.30E-44 |
| A_24_P13533  | PPIL5    | 0.680739 | 1.54E-43 |
| A_23_P163787 | MMP2     | 0.68043  | 1.74E-43 |
| A_32_P96719  | SHCBP1   | 0.680295 | 1.84E-43 |
| A_24_P246173 | MYO9B    | 0.679072 | 2.96E-43 |
| A_23_P115872 | CEP55    | 0.67855  | 3.63E-43 |
| A_32_P234604 | PFN1     | 0.678392 | 3.86E-43 |
| A_24_P162718 | LMNA     | 0.678345 | 3.93E-43 |

(Continued)

| Probe        | symbol  | R        | P value  |
|--------------|---------|----------|----------|
| A_24_P135322 | NRP1    | 0.677862 | 4.74E-43 |
| A_23_P24104  | PLAU    | 0.677204 | 6.11E-43 |
| A_23_P74138  | TAGLN2  | 0.677157 | 6.22E-43 |
| A_23_P254271 | TUBB6   | 0.676966 | 6.70E-43 |
| A_23_P88865  | CMTM3   | 0.676955 | 6.73E-43 |
| A_23_P105028 | ATL3    | 0.676853 | 7.00E-43 |
| A_23_P34835  | LMNA    | 0.676815 | 7.10E-43 |
| A_23_P168788 | PLOD3   | 0.676469 | 8.12E-43 |
| A_23_P30884  | CLIC1   | 0.676228 | 8.91E-43 |
| A_23_P253434 | FNDC3B  | 0.674565 | 1.69E-42 |
| A_23_P12514  | RHOC    | 0.67408  | 2.03E-42 |
| A_24_P297539 | UBE2C   | 0.673926 | 2.15E-42 |
| A_23_P131866 | AURKA   | 0.673517 | 2.52E-42 |
| A_23_P16944  | SDC1    | 0.672413 | 3.83E-42 |
| A_32_P194848 | TAGLN2  | 0.671747 | 4.93E-42 |
| A_23_P127926 | WEE1    | 0.671521 | 5.37E-42 |
| A_24_P188071 | TUBA1C  | 0.671435 | 5.55E-42 |
| A_23_P88331  | DLGAP5  | 0.671431 | 5.56E-42 |
| A_23_P406424 | RHOC    | 0.671417 | 5.58E-42 |
| A_24_P57426  | COL18A1 | 0.671154 | 6.17E-42 |
| A_23_P34126  | BGN     | 0.670763 | 7.15E-42 |
| A_24_P186414 | ZFAND3  | 0.670729 | 7.24E-42 |
| A_24_P399888 | CENPM   | 0.669638 | 1.09E-41 |
| A_23_P83328  | ENG     | 0.669158 | 1.31E-41 |
| A_23_P92132  | IFRD2   | 0.668983 | 1.40E-41 |
| A_23_P434919 | RAB42   | 0.668767 | 1.51E-41 |
| A_24_P322741 | IL10RB  | 0.668721 | 1.54E-41 |
| A_23_P212458 | SEC61A1 | 0.668334 | 1.78E-41 |
| A_23_P118815 | BIRC5   | 0.667256 | 2.66E-41 |
| A_23_P62115  | TIMP1   | 0.666212 | 3.92E-41 |
| A_24_P257099 | HJURP   | 0.665546 | 5.01E-41 |
| A_23_P62831  | FAM176B | 0.665474 | 5.15E-41 |
| A_23_P67708  | TCF3    | 0.6653   | 5.49E-41 |
| A_23_P57588  | GTSE1   | 0.663984 | 8.91E-41 |
| A_23_P145357 | BAK1    | 0.66318  | 1.20E-40 |
| A_23_P49597  | PLSCR3  | 0.663165 | 1.20E-40 |
| A_23_P310956 | COL6A2  | 0.662477 | 1.55E-40 |

(Continued)



| Probe        | symbol   | R        | P value  |
|--------------|----------|----------|----------|
| A_23_P154675 | SNRPB    | 0.662273 | 1.67E-40 |
| A_23_P204702 | TMBIM6   | 0.661743 | 2.02E-40 |
| A_24_P370156 | MAN2B1   | 0.660629 | 3.03E-40 |
| A_23_P40347  | HM13     | 0.660564 | 3.10E-40 |
| A_23_P57417  | MMP11    | 0.660027 | 3.77E-40 |
| A_23_P47148  | NOX4     | 0.659978 | 3.83E-40 |
| A_23_P137103 | EIF4A1   | 0.659548 | 4.48E-40 |
| A_23_P109452 | CHEK2    | 0.659316 | 4.87E-40 |
| A_24_P60930  | BMP1     | 0.659286 | 4.93E-40 |
| A_23_P201483 | MAPKAPK2 | 0.659014 | 5.43E-40 |
| A_23_P51853  | ZDHHC18  | 0.658911 | 5.64E-40 |
| A_23_P149992 | PDLIM1   | 0.658871 | 5.72E-40 |
| A_23_P11874  | MPZL1    | 0.658134 | 7.45E-40 |
| A_23_P251499 | PCOLCE   | 0.657124 | 1.07E-39 |
| A_23_P98898  | CDK2     | 0.656645 | 1.27E-39 |
| A_23_P94795  | TEAD4    | 0.655766 | 1.74E-39 |
| A_23_P124417 | BUB1     | 0.654966 | 2.31E-39 |
| A_23_P250122 | FAM20C   | 0.653978 | 3.28E-39 |
| A_23_P214185 | UBE2J1   | 0.653742 | 3.56E-39 |
| A_23_P5392   | TP53I3   | 0.653536 | 3.83E-39 |
| A_23_P94422  | MELK     | 0.653432 | 3.97E-39 |
| A_23_P72651  | ECSCR    | 0.653097 | 4.47E-39 |
| A_23_P65757  | CCNB2    | 0.652382 | 5.75E-39 |
| A_32_P149432 | EIF4A1   | 0.652342 | 5.83E-39 |
| A_23_P40174  | MMP9     | 0.652335 | 5.85E-39 |
| A_23_P385861 | CDCA2    | 0.652204 | 6.12E-39 |
| A_23_P78664  | DDX39    | 0.652039 | 6.49E-39 |
| A_32_P66843  | C19orf69 | 0.651816 | 7.01E-39 |
| A_23_P201047 | THBS3    | 0.651368 | 8.20E-39 |
| A_32_P167239 | AFAP1L1  | 0.650891 | 9.69E-39 |
| A_23_P200507 | CNIH4    | 0.650772 | 1.01E-38 |
| A_23_P44836  | NT5DC2   | 0.650724 | 1.03E-38 |
| A_23_P23457  | FBLIM1   | 0.650484 | 1.12E-38 |
| A_23_P156327 | TGFBI    | 0.65025  | 1.21E-38 |
| A_23_P137532 | PLOD1    | 0.650231 | 1.22E-38 |
| A_23_P101796 | SYDE1    | 0.649856 | 1.39E-38 |
| A_23_P211212 | COL18A1  | 0.649454 | 1.60E-38 |

(Continued)

| Probe        | symbol   | R        | P value  |
|--------------|----------|----------|----------|
| A_23_P140907 | TMEM8A   | 0.648987 | 1.88E-38 |
| A_24_P318656 | ITGB3    | 0.648464 | 2.26E-38 |
| A_23_P57927  | HYAL2    | 0.648156 | 2.51E-38 |
| A_23_P49627  | MRC2     | 0.648086 | 2.57E-38 |
| A_23_P161194 | VIM      | 0.648056 | 2.60E-38 |
| A_24_P119745 | FN1      | 0.647336 | 3.33E-38 |
| A_23_P52738  | DCPS     | 0.647107 | 3.60E-38 |
| A_24_P12413  | TRAM2    | 0.646241 | 4.85E-38 |
| A_23_P256334 | ITGA1    | 0.6458   | 5.65E-38 |
| A_24_P242391 | MPZL1    | 0.645369 | 6.54E-38 |
| A_23_P146644 | ANXA2    | 0.645    | 7.42E-38 |
| A_23_P57379  | CDC45L   | 0.644891 | 7.70E-38 |
| A_32_P94798  | ANXA2    | 0.644438 | 8.99E-38 |
| A_24_P413884 | CENPA    | 0.643415 | 1.27E-37 |
| A_23_P73982  | TMEM48   | 0.643399 | 1.28E-37 |
| A_23_P60856  | TSPAN4   | 0.642982 | 1.48E-37 |
| A_23_P122815 | CALU     | 0.642544 | 1.71E-37 |
| A_23_P158593 | COL5A1   | 0.642377 | 1.81E-37 |
| A_24_P96403  | RUNX1    | 0.642235 | 1.90E-37 |
| A_23_P210763 | JAG1     | 0.64218  | 1.94E-37 |
| A_23_P117852 | KIAA0101 | 0.641936 | 2.10E-37 |
| A_24_P270144 | CD63     | 0.641544 | 2.40E-37 |
| A_23_P100486 | VKORC1   | 0.641536 | 2.41E-37 |
| A_24_P85539  | FN1      | 0.640669 | 3.22E-37 |
| A_23_P93321  | TCF19    | 0.640146 | 3.84E-37 |
| A_23_P50477  | BCL2L12  | 0.639782 | 4.34E-37 |
| A_23_P258281 | GPR172A  | 0.639384 | 4.96E-37 |
| A_23_P311616 | JMJD6    | 0.638923 | 5.78E-37 |
| A_23_P255016 | UGGT1    | 0.638776 | 6.08E-37 |
| A_23_P141965 | HAUS8    | 0.638638 | 6.36E-37 |
| A_23_P78802  | PRKD2    | 0.638514 | 6.63E-37 |
| A_23_P42575  | CALD1    | 0.638354 | 6.99E-37 |
| A_24_P204244 | ANXA2P1  | 0.638207 | 7.34E-37 |
| A_23_P122052 | GPX8     | 0.637626 | 8.91E-37 |
| A_23_P4913   | KDELRL1  | 0.637223 | 1.02E-36 |
| A_23_P107412 | P4HB     | 0.637051 | 1.08E-36 |
| A_23_P340848 | PTGIR    | 0.636938 | 1.12E-36 |

(Continued)

| Probe        | symbol       | R        | P value  |
|--------------|--------------|----------|----------|
| A_23_P153745 | IFI30        | 0.636765 | 1.19E-36 |
| A_23_P132793 | MANF         | 0.636673 | 1.22E-36 |
| A_23_P308581 | C6orf153     | 0.636353 | 1.36E-36 |
| A_23_P216501 | TPM2         | 0.635572 | 1.76E-36 |
| A_23_P138507 | CDC2         | 0.635369 | 1.88E-36 |
| A_23_P106532 | CHST14       | 0.634568 | 2.45E-36 |
| A_23_P49878  | FAM64A       | 0.634376 | 2.61E-36 |
| A_23_P76515  | LASS5        | 0.634231 | 2.74E-36 |
| A_23_P54834  | NIP7         | 0.633987 | 2.96E-36 |
| A_23_P64232  | ZNF259       | 0.633734 | 3.22E-36 |
| A_24_P245646 | TP53RK       | 0.633592 | 3.37E-36 |
| A_23_P74097  | TCEB3        | 0.633483 | 3.50E-36 |
| A_23_P124084 | LOXL1        | 0.633236 | 3.79E-36 |
| A_23_P87513  | ATP6V0A2     | 0.632418 | 4.95E-36 |
| A_23_P138796 | AMOTL1       | 0.632336 | 5.09E-36 |
| A_23_P67360  | PLEKHA4      | 0.632202 | 5.31E-36 |
| A_24_P6921   | LOC541471    | 0.631604 | 6.46E-36 |
| A_24_P408047 | PLEKHA4      | 0.631526 | 6.62E-36 |
| A_24_P198598 | PML          | 0.631117 | 7.56E-36 |
| A_32_P192842 | LOC100293208 | 0.630598 | 8.95E-36 |
| A_24_P273143 | NCRNA00152   | 0.630441 | 9.42E-36 |
| A_23_P155815 | NCAPG        | 0.630426 | 9.46E-36 |
| A_23_P50108  | NDC80        | 0.630289 | 9.89E-36 |
| A_24_P322354 | SKA1         | 0.630286 | 9.90E-36 |
| A_23_P212844 | TACC3        | 0.630282 | 9.91E-36 |
| A_23_P212696 | FSTL1        | 0.629751 | 1.18E-35 |
| A_24_P932887 | SPOCD1       | 0.62966  | 1.21E-35 |
| A_24_P56130  | MYL6         | 0.629324 | 1.35E-35 |
| A_23_P4919   | KDELR1       | 0.629241 | 1.39E-35 |
| A_32_P32254  | COL6A1       | 0.629073 | 1.46E-35 |
| A_23_P73972  | GPX7         | 0.628896 | 1.55E-35 |
| A_23_P41246  | MFSD10       | 0.628584 | 1.71E-35 |
| A_23_P48099  | NUP37        | 0.628502 | 1.76E-35 |
| A_23_P119943 | IGFBP2       | 0.628344 | 1.85E-35 |
| A_23_P161190 | VIM          | 0.628291 | 1.88E-35 |
| A_23_P205449 | CDCA4        | 0.628165 | 1.96E-35 |
| A_32_P108254 | FAM20A       | 0.62804  | 2.04E-35 |

(Continued)

| Probe        | symbol   | R        | P value  |
|--------------|----------|----------|----------|
| A_23_P148475 | KIF4A    | 0.628002 | 2.07E-35 |
| A_23_P103672 | NES      | 0.627453 | 2.46E-35 |
| A_32_P525524 | ITPRIPL1 | 0.627383 | 2.52E-35 |
| A_24_P313504 | PLK1     | 0.62738  | 2.52E-35 |
| A_24_P304723 | PPIB     | 0.626746 | 3.09E-35 |
| A_23_P203882 | MMP19    | 0.626672 | 3.16E-35 |
| A_23_P153889 | PGLS     | 0.626642 | 3.19E-35 |
| A_23_P60079  | ANGPT2   | 0.62644  | 3.41E-35 |
| A_23_P344973 | MYL6     | 0.626283 | 3.58E-35 |
| A_23_P208293 | PVRL2    | 0.62573  | 4.27E-35 |
| A_24_P407866 | SC65     | 0.625005 | 5.38E-35 |
| A_23_P143190 | MYBL2    | 0.624778 | 5.78E-35 |
| A_24_P82106  | MMP14    | 0.624373 | 6.58E-35 |
| A_24_P876522 | GPX8     | 0.623448 | 8.81E-35 |
| A_23_P88731  | RAD51    | 0.623263 | 9.34E-35 |
| A_23_P16523  | GDF15    | 0.623072 | 9.92E-35 |
| A_23_P316601 | RIT1     | 0.622465 | 1.20E-34 |
| A_23_P423864 | PHC2     | 0.622431 | 1.21E-34 |
| A_23_P9614   | NDUFA4L2 | 0.622314 | 1.26E-34 |
| A_23_P370625 | SEPN1    | 0.622086 | 1.35E-34 |
| A_23_P67288  | CALR     | 0.621819 | 1.47E-34 |
| A_23_P102769 | C20orf72 | 0.62149  | 1.63E-34 |
| A_23_P58321  | CCNA2    | 0.621157 | 1.81E-34 |
| A_23_P165360 | ASB1     | 0.621129 | 1.83E-34 |
| A_23_P411814 | OSTC     | 0.620901 | 1.96E-34 |
| A_23_P50456  | POLD1    | 0.620652 | 2.12E-34 |
| A_23_P368896 | SNX12    | 0.619799 | 2.77E-34 |
| A_32_P54442  | CHPF2    | 0.619615 | 2.93E-34 |
| A_24_P352952 | FAM20A   | 0.619137 | 3.40E-34 |
| A_23_P130182 | AURKB    | 0.61885  | 3.72E-34 |
| A_23_P154500 | DNMT3A   | 0.618648 | 3.96E-34 |
| A_24_P223124 | FNDC3B   | 0.618248 | 4.48E-34 |
| A_23_P350467 | MAPKAPK2 | 0.618245 | 4.48E-34 |
| A_24_P932435 | ANGPT2   | 0.618115 | 4.67E-34 |
| A_23_P129614 | NUDT21   | 0.617884 | 5.01E-34 |
| A_23_P36562  | ITGA5    | 0.617842 | 5.08E-34 |
| A_23_P126266 | HLX      | 0.617795 | 5.15E-34 |

(Continued)

| Probe        | symbol    | R        | P value  |
|--------------|-----------|----------|----------|
| A_23_P20566  | TPM2      | 0.617247 | 6.10E-34 |
| A_23_P4662   | BCL3      | 0.617166 | 6.26E-34 |
| A_23_P209183 | GLT25D1   | 0.616844 | 6.91E-34 |
| A_32_P210202 | E2F7      | 0.616778 | 7.05E-34 |
| A_23_P136805 | ARHGAP11A | 0.61658  | 7.50E-34 |
| A_23_P25224  | CSDA      | 0.616093 | 8.71E-34 |
| A_24_P320545 | PTK7      | 0.615815 | 9.49E-34 |
| A_23_P45475  | GLA       | 0.615814 | 9.49E-34 |
| A_23_P100127 | CASC5     | 0.615745 | 9.69E-34 |
| A_23_P16469  | PLAUR     | 0.615719 | 9.77E-34 |
| A_23_P334608 | GUSB      | 0.615161 | 1.16E-33 |
| A_23_P133656 | LAMA4     | 0.614568 | 1.39E-33 |
| A_24_P918907 | LOC154761 | 0.61426  | 1.53E-33 |
| A_23_P132277 | MCM5      | 0.614233 | 1.54E-33 |
| A_23_P32707  | ESPL1     | 0.614162 | 1.57E-33 |
| A_23_P408328 | TRIOBP    | 0.614004 | 1.65E-33 |
| A_23_P67913  | GMPPA     | 0.613705 | 1.81E-33 |
| A_23_P114232 | PRDX4     | 0.613663 | 1.83E-33 |
| A_23_P163458 | EHD4      | 0.613418 | 1.97E-33 |
| A_24_P146892 | ORAI1     | 0.613243 | 2.08E-33 |
| A_23_P81805  | VEGFA     | 0.61311  | 2.17E-33 |
| A_24_P37903  | LOX       | 0.613028 | 2.22E-33 |
| A_23_P431388 | SPOCD1    | 0.61297  | 2.26E-33 |
| A_23_P333605 | ENPEP     | 0.612943 | 2.28E-33 |
| A_23_P163087 | NID2      | 0.612795 | 2.39E-33 |
| A_32_P827528 | S1PR2     | 0.612466 | 2.64E-33 |
| A_23_P133956 | KIFC1     | 0.612388 | 2.70E-33 |
| A_23_P202327 | ADAM12    | 0.612246 | 2.82E-33 |
| A_23_P68610  | TPX2      | 0.612128 | 2.92E-33 |
| A_23_P375    | CDCA8     | 0.612124 | 2.93E-33 |
| A_24_P29260  | MGAT4B    | 0.612092 | 2.95E-33 |
| A_32_P135902 | EIF4A1    | 0.612067 | 2.98E-33 |
| A_23_P118174 | PLK1      | 0.611996 | 3.04E-33 |
| A_24_P372862 | ETV6      | 0.611978 | 3.06E-33 |
| A_24_P410686 | KDELR2    | 0.611706 | 3.32E-33 |
| A_23_P107206 | STAT3     | 0.61142  | 3.62E-33 |
| A_23_P305100 | KIAA1919  | 0.610176 | 5.27E-33 |

(Continued)

| Probe        | symbol   | R        | P value  |
|--------------|----------|----------|----------|
| A_23_P94030  | LAMB1    | 0.610134 | 5.34E-33 |
| A_23_P387057 | TUBB     | 0.609956 | 5.63E-33 |
| A_23_P16673  | CNN2     | 0.609561 | 6.34E-33 |
| A_23_P47304  | CASP5    | 0.609391 | 6.67E-33 |
| A_23_P25626  | C13orf34 | 0.609357 | 6.74E-33 |
| A_23_P118061 | CKLF     | 0.609274 | 6.91E-33 |
| A_23_P487    | UCK2     | 0.609208 | 7.05E-33 |
| A_24_P67988  | FRMD8    | 0.609192 | 7.08E-33 |
| A_23_P382688 | FAM122B  | 0.608969 | 7.57E-33 |
| A_23_P366394 | ZAK      | 0.608866 | 7.81E-33 |
| A_23_P257144 | PXDN     | 0.608712 | 8.18E-33 |
| A_24_P390793 | EIF4A1   | 0.608685 | 8.24E-33 |
| A_23_P34788  | KIF2C    | 0.608539 | 8.61E-33 |
| A_23_P130900 | NCLN     | 0.608384 | 9.02E-33 |
| A_32_P49188  | ALG9     | 0.608029 | 1.00E-32 |
| A_23_P111888 | CTHRC1   | 0.608028 | 1.00E-32 |
| A_32_P62997  | PBK      | 0.607801 | 1.07E-32 |
| A_23_P7636   | PTTG1    | 0.607678 | 1.11E-32 |
| A_23_P153197 | TGIF1    | 0.607544 | 1.16E-32 |
| A_23_P103628 | HEATR1   | 0.607366 | 1.22E-32 |
| A_23_P500799 | CASP6    | 0.60717  | 1.30E-32 |
| A_24_P323434 | CDCA2    | 0.606826 | 1.44E-32 |
| A_24_P417984 | PPP1R14B | 0.606824 | 1.44E-32 |
| A_23_P28733  | RBL1     | 0.606633 | 1.52E-32 |
| A_23_P18579  | PTTG2    | 0.606311 | 1.67E-32 |
| A_23_P56328  | PLVAP    | 0.606238 | 1.71E-32 |
| A_24_P14156  | NDC80    | 0.605825 | 1.93E-32 |
| A_24_P323598 | ESCO2    | 0.605737 | 1.98E-32 |
| A_23_P145584 | UBE2H    | 0.605639 | 2.04E-32 |
| A_23_P200928 | NID1     | 0.60556  | 2.09E-32 |
| A_23_P120458 | RNF114   | 0.605156 | 2.36E-32 |
| A_23_P57497  | MYH9     | 0.605137 | 2.37E-32 |
| A_23_P416656 | MYO1C    | 0.604932 | 2.52E-32 |
| A_24_P19337  | ASXL1    | 0.604725 | 2.68E-32 |
| A_23_P145863 | S100A11  | 0.604679 | 2.71E-32 |
| A_23_P306655 | AMIGO3   | 0.604676 | 2.72E-32 |
| A_23_P99063  | LUM      | 0.604009 | 3.31E-32 |

(Continued)

| Probe        | symbol    | R        | P value  |
|--------------|-----------|----------|----------|
| A_24_P921366 | CALD1     | 0.603998 | 3.32E-32 |
| A_23_P93677  | C7orf42   | 0.603994 | 3.32E-32 |
| A_23_P316741 | TSPAN4    | 0.603805 | 3.51E-32 |
| A_23_P404259 | GPX8      | 0.603185 | 4.21E-32 |
| A_23_P69188  | DPH3      | 0.602883 | 4.60E-32 |
| A_23_P149200 | CDC20     | 0.602592 | 5.01E-32 |
| A_23_P57736  | CMTM6     | 0.60252  | 5.12E-32 |
| A_24_P334130 | FN1       | 0.602375 | 5.34E-32 |
| A_23_P387943 | CASP2     | 0.602077 | 5.83E-32 |
| A_23_P164451 | TBX2      | 0.601902 | 6.13E-32 |
| A_23_P122197 | CCNB1     | 0.601871 | 6.19E-32 |
| A_23_P22957  | SH3GLB1   | 0.601548 | 6.80E-32 |
| A_24_P399680 | C20orf108 | 0.601533 | 6.83E-32 |
| A_23_P162540 | KCTD10    | 0.601413 | 7.08E-32 |
| A_23_P124733 | COQ2      | 0.60141  | 7.08E-32 |
| A_23_P201778 | PTPN7     | 0.600693 | 8.73E-32 |
| A_23_P253752 | FAM54A    | 0.600548 | 9.10E-32 |
| A_24_P462899 | C6orf173  | 0.600523 | 9.17E-32 |
| A_23_P52676  | CATSPER1  | 0.600382 | 9.55E-32 |
| A_23_P113994 | KIRREL    | 0.600349 | 9.65E-32 |
| A_24_P416079 | NUSAP1    | 0.600112 | 1.03E-31 |
| A_23_P25121  | FKBP11    | 0.600076 | 1.04E-31 |
